# Supplementary material
Source: HighWire-hosted journal article supplement (https://ajnr-sso.highwirestaging.com/highwire/filestream/102162/field_highwire_adjunct_files/0/1063.pdf)
Supplement: 1063.pdf [file 1063.pdf]

## **Online Supplemental Data**

This appendix has been provided by the authors to give readers additional information about their work

Table 1. Demographic characteristics of training cohort for mRS score.

Table S1. Feature classification

Table S2. Covariance diagnosis

Table S3. Demographic characteristics of testing cohort for mRS score.

Table S4. Diagnostic performance of the integrated model in the training and testing cohorts.

Figure S1. Receiver operating characteristic curve results from the integrated model.

Figure S2. Calculation formula and implications of RFs.

## Supplementary Tables

**Table 1.** Demographic characteristics of training cohort for mRS score.

|                                            | mRS > 3 (N = 56) | mRS ≤ 3 (N = 35) | P      |
|--------------------------------------------|------------------|------------------|--------|
| <b>Demographic information</b>             |                  |                  |        |
| Age (years)                                | 62±11            | 57±13            | 0.09   |
| male sex no. (%)                           | 41 (73.2%)       | 29 (82.9%)       | 0.29   |
| Premorbid mRS, 0                           | 50 (89.3%)       | 30 (85.7%)       | 0.61   |
| <b>Imaging Score</b>                       |                  |                  |        |
| PC ASPECTS score (NCCT)                    | 8 (6-9)          | 8 (7-9)          | 0.15   |
| PC ASPECTS score (DWI)                     | 6 (5-7)          | 7(6-8)           | 0.019* |
| <b>Infarct volume (cm3)</b>                |                  |                  |        |
| pons and midbrain                          | 2.3±1.8          | 1.2±0.9          | 0.001  |
| cerebellum, thalamus, and occipital cortex | 10.6±14.7        | 8.4±11.4         | 0.44   |
| total volume                               | 12.9±14.3        | 9.6±11.4         | 0.23   |
| <b>Stroke information</b>                  |                  |                  |        |
| Initial NIHSS score                        | 27 (17-32)       | 18 (8-27)        | 0.003* |
| Recanalization time (min)                  | 502 (355-645)    | 374 (270-473)    | 0.02*  |
| Imaging time (min)                         | 198 (47-344)     | 115 (35-280)     | 0.28   |

|                                        |            |            |        |
|----------------------------------------|------------|------------|--------|
| Pre-stroke antithrombotic use yes. (%) | 21 (37.5)  | 7 (20.0%)  | 0.08   |
| TOAST classification                   |            |            | 0.19   |
| Large artery atherosclerosis           | 39 (69.6)  | 25 (71.4%) |        |
| Cardioembolism                         | 10 (17.9%) | 9 (25.7%)  |        |
| Other stroke types                     | 7 (12.5%)  | 1 (2.9%)   |        |
| Location of occlusion (%)              |            |            | 0.23   |
| Distal BA                              | 10 (17.9%) | 13 (37.1%) |        |
| Middle BA                              | 24 (42.9%) | 12 (34.3%) |        |
| Proximal BA                            | 9 (16.1%)  | 4 (11.4%)  |        |
| VA-V4                                  | 13 (23.2%) | 6 (17.1%)  |        |
| eTICI grade. (%)                       |            |            | 0.025* |
| 0-2a                                   | 15 (26.8%) | 3 (8.6%)   |        |
| 2b                                     | 14 (25%)   | 5 (14.3%)  |        |
| 2c                                     | 10 (17.9%) | 6 (17.1%)  |        |
| 3                                      | 17 (30.4%) | 21 (60.0%) |        |
| <b>Stroke risks</b>                    |            |            |        |
| Hypertension no. (%)                   | 33 (58.9%) | 27 (77.1%) | 0.07   |
| Diabetes mellitus no. (%)              | 8 (14.3%)  | 5 (14.3%)  | 1.00   |

|                                 |                  |                  |      |
|---------------------------------|------------------|------------------|------|
| Atrial fibrillation no. (%)     | 9 (16.1%)        | 4 (11.4%)        | 0.54 |
| Smoking no. (%)                 | 20 (35.7%)       | 18 (51.4%)       | 0.14 |
| <b>Laboratory information</b>   |                  |                  |      |
| White blood cells (per $\mu$ l) | 11 $\pm$ 4       | 11 $\pm$ 4       | 0.34 |
| Hemoglobin (g/dl)               | 140.0 $\pm$ 21.4 | 141.4 $\pm$ 21.1 | 0.76 |
| Total cholesterol (mg/dl)       | 4.8 $\pm$ 1.2    | 5.2 $\pm$ 1.5    | 0.17 |
| HDL cholesterol (mg/dl)         | 1.3 $\pm$ 0.4    | 1.3 $\pm$ 0.4    | 0.86 |
| Triglycerides (mg/dl)           | 1.8 $\pm$ 2.8    | 1.7 $\pm$ 1.2    | 0.74 |
| LDL cholesterol (mg/dl)         | 2.9 $\pm$ 0.9    | 3.2 $\pm$ 1.3    | 0.36 |
| Systolic BP (mm Hg)             | 152.6 $\pm$ 25.0 | 150.5 $\pm$ 21.6 | 0.68 |
| Diastolic BP (mm Hg)            | 90.4 $\pm$ 17.2  | 88.7 $\pm$ 12.7  | 0.61 |

---

NIHSS, National Institutes of Health Stroke Scale Score; mRS, modified Rankin Score; TOAST, Trial of ORG 10172 in Acute Stroke

Treatment; PC-ASPECT, Posterior circulation-Alberta Stroke Program early computed tomography score; NCCT, Non-contrast computed tomography; DWI, diffusion-weighted imaging; eTICI, extended thrombolysis in cerebral infarction; LDL, low-density lipoprotein; HDL, high-density lipoprotein; BP, blood pressure; MT, mechanical thrombectomy; HbA1c, glycated hemoglobin.

\* $p < 0.05$ .

**Table S1.** Feature classification

| <b>Radiomic features</b> | All<br>(N=3748) | M-W&RF select<br>(N = 28) | LASSO<br>(N = 7) |
|--------------------------|-----------------|---------------------------|------------------|
| Firstorder statistics    | 36              | NA                        | NA               |
| Shape and size           | 28              | 1                         | NA               |
| Textural features        | 150             | 3                         | NA               |
| <b>Image filter</b>      |                 |                           |                  |
| LoG                      | 930             | 20                        | 2                |
| Wavelet                  | 1488            | 41                        | 3                |
| Square                   | 186             | 1                         | NA               |
| Square root              | 186             | 2                         | NA               |
| Logarithm                | 186             | 1                         | NA               |
| Exponential              | 186             | 2                         | NA               |
| Gradient                 | 186             | 2                         | NA               |
| Lbp2D                    | 186             | 5                         | 1                |

M-W, Mann-Whitney U test; RF, Random Forest classifier; LASSO, The Least Absolute Shrinkage and Selection Operator; NA, not applicable

**Table S2.** Covariance diagnosis

| <b>Radiomic feature</b>                     | Tolerance | VIF   |
|---------------------------------------------|-----------|-------|
| log-sigma-1-0-mm-3D_glcml_ClusterProminence | 0.272     | 3.683 |
| log-sigma-2-0-mm-3D_glcml_ClusterTendency   | 0.252     | 3.973 |
| wavelet-LHH_glszm_ZoneVariance              | 0.657     | 1.523 |
| wavelet-HHL_firstorder_Median               | 0.838     | 1.193 |
| lbp-2D_firstorder_TotalEnergy               | 0.302     | 3.307 |

|                      |       |       |
|----------------------|-------|-------|
| wavelet-HLL_glmc_MCC | 0.794 | 1.260 |
|----------------------|-------|-------|

VIF, Variance Inflation Factor.

**Table S3.** Demographic characteristics of testing cohort for mRS score.

|                                            | mRS > 3 (N = 12) | mRS ≤ 3 (N = 19) | P      |
|--------------------------------------------|------------------|------------------|--------|
| <b>Demographic information</b>             |                  |                  |        |
| Age (years)                                | 67±7             | 61±11            | 0.11   |
| male sex no. (%)                           | 8 (66.7%)        | 18 (94.7%)       | 0.06   |
| Premorbid mRS, 0                           | 9 (75.0%)        | 13 (68.4%)       | 1.00   |
| <b>Imaging Score</b>                       |                  |                  |        |
| PC ASPECTS score (NCCT)                    | 8 (6-9)          | 8 (7-9)          | 0.33   |
| PC ASPECTS score (DWI)                     | 7 (4-8)          | 7 (6-8)          | 0.23   |
| <b>Infarct volume (cm<sup>3</sup>)</b>     |                  |                  |        |
| pons and midbrain                          | 2.7±2.8          | 0.5±0.5          | 0.001  |
| cerebellum, thalamus, and occipital cortex | 15.1±24.5        | 9.2±1.0          | 0.44   |
| total volume                               | 17.8±26.7        | 9.7±1.0          | 0.33   |
| <b>Stroke information</b>                  |                  |                  |        |
| Initial NIHSS score                        | 25 (16-32)       | 7 (3-15)         | 0.001* |

|                                        |               |               |      |
|----------------------------------------|---------------|---------------|------|
| Recanalization time (min)              | 550 (405-921) | 595 (417-762) | 1.00 |
| Imaging time (min)                     | 616 (163-896) | 316 (190-456) | 0.55 |
| Pre-stroke antithrombotic use yes. (%) | 3 (25.0%)     | 4 (21.1%)     | 1.00 |
| TOAST classification                   |               |               | 0.26 |
| Large artery atherosclerosis           | 10 (83.3%)    | 15 (78.9%)    |      |
| Cardioembolism                         | 1 (8.3%)      | 4 (21.1%)     |      |
| Other stroke types                     | 1 (8.3%)      | 0 (0.0%)      |      |
| Location of occlusion (%)              |               |               | 0.58 |
| Distal BA                              | 4 (33.3%)     | 4 (21.1%)     |      |
| Middle BA                              | 1 (8.3%)      | 4 (21.1%)     |      |
| Proximal BA                            | 3 (25.0%)     | 7 (36.8%)     |      |
| VA-V4                                  | 4 (33.3%)     | 4 (21.1%)     |      |
| eTICI. (%)                             |               |               | 0.01 |
| 0-2a                                   | 4 (33.3%)     | 1 (5.3%)      |      |
| 2b                                     | 4 (33.3%)     | 2 (10.5%)     |      |
| 2c                                     | 0 (0.0%)      | 5 (26.3%)     |      |
| 3                                      | 4 (33.3%)     | 11 (57.9%)    |      |
| <b>Stroke risks</b>                    |               |               |      |

|                                 |                  |                  |      |
|---------------------------------|------------------|------------------|------|
| Hypertension no. (%)            | 11 (91.7%)       | 15 (78.9%)       | 0.62 |
| Diabetes mellitus no. (%)       | 4 (33.3%)        | 6 (31.6%)        | 1.00 |
| Atrial fibrillation no. (%)     | 1 (8.3%)         | 2 (10.5%)        | 1.00 |
| Smoking no. (%)                 | 5 (41.7%)        | 13 (68.4%)       | 0.26 |
| <b>Laboratory information</b>   |                  |                  |      |
| White blood cells (per $\mu$ l) | 9.2 $\pm$ 2.0    | 9.2 $\pm$ 2.9    | 0.98 |
| Total cholesterol (mg/dl)       | 4.6 $\pm$ 1.6    | 3.9 $\pm$ 1.1    | 0.25 |
| HDL cholesterol (mg/dl)         | 1.1 (1.0-1.2)    | 1.1 (0.9-1.2)    | 0.75 |
| Triglycerides (mg/dl)           | 1.1 (0.8-1.2)    | 1.1 (0.8-1.5)    | 1.00 |
| LDL cholesterol (mg/dl)         | 2.9 $\pm$ 1.4    | 2.2 $\pm$ 0.9    | 0.14 |
| Systolic BP (mm Hg)             | 149.0 $\pm$ 22.7 | 161.8 $\pm$ 28.2 | 0.20 |
| Diastolic BP (mm Hg)            | 81.9 $\pm$ 10.2  | 85.7 $\pm$ 18.2  | 0.52 |

---

NIHSS, National Institutes of Health Stroke Scale Score; mRS, modified Rankin Score; TOAST, Trial of ORG 10172 in Acute Stroke

Treatment; PC-ASPECT, Posterior circulation-Alberta Stroke Program early computed tomography score; NCCT, Non-contrast computed tomography; DWI, diffusion-weighted imaging; LDL, low-density lipoprotein; HDL, high-density lipoprotein; BP, blood pressure; MT, mechanical thrombectomy; HbA1c, glycated hemoglobin.



\*p < 0.05.

**Table S4.** Diagnostic performance of the integrated model in the training and testing cohorts.

|                 | AUC                 | Accuracy | Sensitivity | Specificity | PPV   | NPV   |
|-----------------|---------------------|----------|-------------|-------------|-------|-------|
| Training cohort | 0.853 (0.763-0.919) | 81.3%    | 68.2%       | 89.4%       | 85.7% | 75.0% |
| Testing cohort  | 0.776 (0.591-0.906) | 74.2%    | 78.9%       | 66.7%       | 78.9% | 66.7% |

AUC, area under the curve; CI, confidence interval; NPV, negative predictive value; PPV, positive predictive value

Supplementary figures

Figure S1. Receiver operating characteristic curve results from the integrated model.

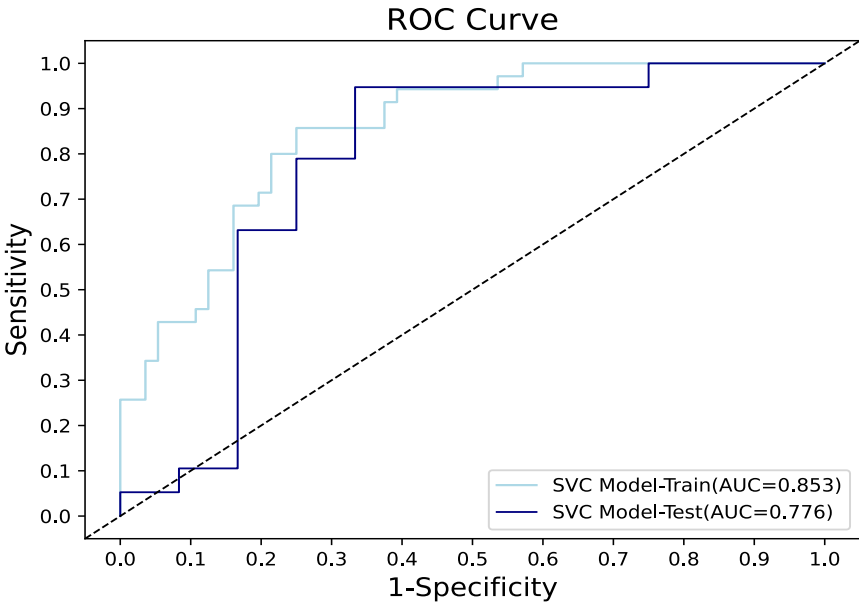

Integrated model (RFs and TICI scores).

Figure S2. Calculation formula and implications of RFs.

**1.Total Energy:** Here, is optional value, defined by voxelArrayShift, which shifts the intensities to prevent negative values in X. This ensures that voxels with the lowest gray values contribute the least to Energy, instead of voxels with gray level intensity closest to 0. Total Energy is the value of Energy feature scaled by the volume of the voxel in cubic mm.

$$total\ energy = V_{voxel} \sum_{i=1}^{N_p} (X(i) + c)^2$$

**2.Median:**The median gray level intensity within the ROI.

**3.Cluster Prominence:** Cluster Prominence is a measure of the skewness and asymmetry of the GLCM. A higher values implies more asymmetry about the mean while a lower value indicates a peak near the mean value and less variation about the mean.

$$cluster\ prominence = \sum_{i=1}^{N_g} \sum_{j=1}^{N_g} (i + j - \mu_x - \mu_y)^4 p(i, j)$$

**4.Cluster Tendency:** Cluster Tendency is a measure of groupings of voxels with similar gray-level values.

$$cluster\ tendency = \sum_{i=1}^{N_g} \sum_{j=1}^{N_g} (i + j - \mu_x - \mu_y)^2 p(i, j)$$

**5.Maximal Correlation Coefficient:** The Maximal Correlation Coefficient is a measure of complexity of the texture and  $0 \leq MCC \leq 1$ . In case of a flat region, each GLCM matrix has shape (1, 1), resulting in just 1 eigenvalue. In this case, an arbitrary value of 1 is returned.

$$MCC = \sqrt{\text{second largest eigenvalue of } Q}$$

$$Q(i, j) = \sum_{k=0}^{N_g} \frac{p(i, k)p(j, k)}{p_x(i)p_y(k)}$$

**6.Zone Variance (ZV):** ZV measures the variance in zone size volumes for the zones.

$$ZV = \sum_{i=1}^{N_g} \sum_{j=1}^{N_g} p(i, j)(j - \mu)^2 \quad \mu = \sum_{i=1}^{N_g} \sum_{j=1}^{N_g} p(i, j)j$$
